1 **Neuromuscular control of hovering wingbeat kinematics in response to distinct flight**  
2 **challenges in the ruby-throated hummingbird (*Archilochus colubris*)**

3

4 Sajeni Mahalingam<sup>\*†</sup> and Kenneth C. Welch Jr.<sup>\*‡</sup>

5

6 <sup>\*</sup>Department of Biological Sciences, University of Toronto Scarborough, Toronto, Ontario, M1C  
7 1A4, Canada

8 and

9 Department of Cell & Systems Biology, University of Toronto, Toronto, Ontario, M5S 3G5,  
10 Canada

11

12 <sup>†</sup>Present address: Department of Biology, McMaster University, Hamilton, Ontario, L8S 4L8,  
13 Canada

14

15 <sup>‡</sup>Corresponding author; e-mail: [kwelch@utsc.utoronto.ca](mailto:kwelch@utsc.utoronto.ca); phone: (416) 208-5100; fax: (416)  
16 287-7676

17

18 **Keywords:** Ruby-throated hummingbirds, *Archilochus colubris*, electromyography, flight  
19 muscles, wingbeat kinematics, hovering flight

20

21 **Running title:** Muscle activity in hovering hummingbirds

22

## 23 **Summary**

24 While producing one of the highest sustained mass-specific power outputs of any  
25 vertebrate, hovering hummingbirds must also precisely modulate the activity of their primary  
26 flight muscles to vary wingbeat kinematics and modulate lift production. While recent studies  
27 have begun to explore how pectoralis (the primary downstroke muscle) neuromuscular activation  
28 and wingbeat kinematics are linked in hummingbirds, it is unclear if different species modulate  
29 these features in similar ways, or consistently in response to distinct flight challenges. In  
30 addition, little is known about how the antagonist, the supracoracoideus, is modulated to power  
31 the symmetrical hovering upstroke. We obtained simultaneous recordings of wingbeat  
32 kinematics and electromyograms (EMGs) from the pectoralis and supracoracoideus in ruby-  
33 throated hummingbirds (*Archilochus colubris*) while hovering under the following conditions 1)  
34 ambient air 2) air density reduction trials 3) submaximal load lifting trials and 4) maximal load  
35 lifting trials. Increased power output was achieved through increased stroke amplitude during  
36 both treatments, but wingbeat frequency only increased at low air densities. Overall, relative  
37 EMG intensity was the best predictor of stroke amplitude and is correlated with angular velocity  
38 of the wingtip. The relationship between muscle activation intensity and kinematics was  
39 independent of treatment type, indicating reduced drag on the wings in hypodense air did not  
40 lead to high wingtip angular velocities independently of increased muscle work. EMG bursts  
41 consistently began and ended before muscle shortening under all conditions. During all sustained  
42 hovering spike number per burst consistently averaged 1.2 in the pectoralis and 2.0 in the  
43 supracoracoideus. The number of spikes increased to 2.5-3 in both muscles during maximal load  
44 lifting trials. Despite the relative kinematic symmetry of the hovering downstroke and upstroke,  
45 the supracoracoideus was activated ~1 ms earlier, EMG bursts were longer (~0.9 ms), and

46 exhibited 1.6 times as many spikes per burst. We hypothesize that earlier and more sustained  
47 activation of the supracoracoideus fibers is necessary to offset greater compliance resulting from  
48 the presence of the supracoracoid tendon.

49

## 50 **Introduction**

51 Understanding how flight muscles function has been of particular interest to biologists  
52 because these muscles power the most expensive form of locomotion. Several studies have  
53 examined how wingbeat kinematics, neuromuscular activation patterns, and mechanical function  
54 in the pectoralis, the primary downstroke muscle, vary with forward flight velocity (Tobalske et  
55 al., 1997; Hedrick et al., 2003; Ellerby and Askew, 2007; Tobalske et al., 2010). In agreement  
56 with recent work quantifying metabolic power input as a function of flight velocity (Tobalske et  
57 al., 2003; Askew and Ellerby, 2007) these studies have generally noted a U-shaped power curve  
58 and a similar pattern in the electromyographic (EMG) recordings, with power output and EMG  
59 intensity greatest at either velocity extreme and lowest at moderate speeds. Fewer studies have  
60 examined variation in power output or EMG activity in the primary upstroke muscle, the  
61 supracoracoideus (e.g. Tobalske et al., 1997; Tobalske and Biewener, 2008; Tobalske et al.,  
62 2010). Some studies show that variation in neuromuscular activation in the supracoracoideus as a  
63 function of flight velocity is similar to that seen in the pectoralis (Tobalske et al., 1997; Tobalske  
64 et al. 2010). However, the difference in aerodynamic activity of the upstroke and downstroke  
65 during forward flight, as well as the fact that some birds can, with training, achieve takeoff flight  
66 without the use of the surpacoracoideus (Degernes and Feduccia, 2001; Sokoloff et al., 2001),  
67 suggest that the role of the supracoracoideus in powering some flight styles is not easily  
68 predicted.

69           The unique flight of hummingbirds is facilitated by an upstroke that contributes much  
70 more to overall lift production than occurs in other birds during hovering. In hovering  
71 hummingbirds, lift generation during the upstroke is partly the result of a) a stroke plane which is  
72 roughly horizontal and b) rotation of the wing along its long axis (Warrick et al., 2005, 2009).  
73 The features contribute to a hovering wingbeat with greater kinematic symmetry than is observed  
74 in other birds (Warrick et al., 2005, 2009). This kinematic symmetry implies greater similarity in  
75 mechanical power output from the muscles which power the downstroke and upstroke, the  
76 pectoralis and supracoracoideus, respectively. In addition, the supracoracoideus is relatively  
77 larger in hummingbirds, at approximately half the size of the pectoralis (Greenwalt, 1962;  
78 Tobalske et al., 2010). Greater wingbeat symmetry (Warrick et al., 2005, 2009) and greater  
79 morphological similarity (Greenwalt, 1962; Tobalske et al., 2010) suggest potentially greater  
80 correspondence in mechanical function and neuromuscular activation patterning between these  
81 muscles than is seen in other birds.

82           Laboratory investigations into the modulation of power output and wingbeat kinematics  
83 during hovering flight have traditionally imposed one of two challenges: flight in hypodense air  
84 mixtures (e.g. Chai and Dudley, 1995; 1996; Altshuler et al., 2010), or the lifting of additional  
85 mass (Wells, 1993). Studies have revealed variation in the kinematic strategies hummingbirds  
86 can adopt to increase power output related to differences in the nature of the challenge or  
87 possibly to differences among species. During flight in hypodense air in laboratory settings,  
88 investigators have reported that ruby-throated (*Archilochus colubris*; Chai and Dudley, 1995;  
89 1996) and Anna's hummingbirds (*Calypte anna*; Altshuler et al., 2010) increase stroke amplitude  
90 and wingbeat frequency as air density decreased. Researchers have also reported that stroke  
91 amplitude during hovering is greater at higher elevation for species found along natural

92 elevational gradients in the field (Altshuler et al., 2004; Altshuler and Dudley, 2003). In contrast,  
93 Wells (1993) found that broad-tailed (*Selasphorus platycercus*) and rufous hummingbirds (*S.*  
94 *rufus*) that lifted sub-maximal loads increased stroke amplitude but that wingbeat frequency  
95 remained constant.

96       Recently, there has been a resurgence of interest in the neuromuscular control of variation  
97 in power output and wingbeat kinematics during flight in hummingbirds (e.g. Altshuler et al.,  
98 2010; 2012; Tobalske et al., 2010). Beginning in 1968 with a study by Hagiwara et al. and  
99 continuing more recently, investigators have reported unique EMGs from the major flight  
100 muscles consisting of one to a few discrete spikes with each wingbeat (Hagiwara et al., 1968;  
101 Altshuler et al., 2010; Tobalske, 2010). The simple nature of the EMG waveforms in the  
102 hummingbird pectoralis has permitted unique insights into how neuromuscular control, motor  
103 unit recruitment, and kinematic performance are related. Altshuler et al. (2010) have shown that  
104 Anna's hummingbirds achieve increased stroke amplitude in hypodense air via progressive  
105 spatial recruitment of pectoralis motor units, but that temporal recruitment is also required when  
106 both stroke amplitude and wingbeat frequency are dramatically increased during brief asymptotic  
107 maximal load lifting. Tobalske et al. (2010), reported that rufous hummingbird pectoralis and  
108 supracoracoideus EMGs varied in similar ways as birds flew at a range of forward flight  
109 velocities. Nonetheless, we do not understand how variation in the neuromuscular control of the  
110 supracoracoideus during hovering flight (e.g. timing of activation, number of spikes per burst, or  
111 intensity) compares to that of the pectoralis. Additionally, it remains unclear whether differences  
112 in observed variation in wingbeat kinematics among species challenged either by submaximal  
113 load lifting or flight in hypodense air are the result of variation in motor recruitment patterns, or

114 are the result of differences in the amount of drag the wing encounters during flight in fluids of  
115 differing density.

116 To address these questions we studied individual ruby-throated hummingbirds as we  
117 challenged flight performance in four distinct ways (see figure 1): hovering in normodense air,  
118 hovering in progressively less dense air mixtures, the sustainable lifting of progressively greater  
119 submaximal loads in normodense air, and the brief lifting of maximal loads in normodense air.  
120 During each challenge we obtained high speed video recordings in order to determine wingbeat  
121 frequency, stroke amplitude, and the mean angular velocity of the wing tip. In addition, we  
122 simultaneously recorded EMG waveforms from both the pectoralis and supracoracoideus  
123 muscles in order to determine the number of spikes, rectified EMG area (intensity), and timing of  
124 EMG bursts relative to wingbeat transitions (i.e. pronation or supination events, respectively).

125

## 126 **Methods**

### 127 **Experimental Animals**

128 Four adult male ruby-throated hummingbirds (*Archilochus colubris*) were captured in  
129 Scarborough, ON, Canada. The birds were housed individually in 61 by 61 by 61 cm cages.  
130 Birds were fed Nektar Plus (Nekton, Kieselbronnerstr. 28, Pforzheim, Germany) *ad libitum* and  
131 were maintained on a 14:10 L/D cycle. Individual mass averaged  $2.81 \pm 0.09$  g during the  
132 experiments, determined by averaging each individual's mass measured at the beginning and at  
133 the end of the experiment. Capture of animals was accomplished under permit from the Canadian  
134 Wildlife Service in Ontario. All procedures were approved by the University of Toronto  
135 Laboratory Animal Care Committee.

136

**137 Surgical Procedures**

138           Muscle activation patterning was recorded from both the pectoralis and supracoracoideus.  
139    Implantation of electrodes and approaches used in the collection of electromyographic activity  
140    followed protocols described in Altshuler et al. (2010). To accomplish electrode implantation  
141    birds were anaesthetized using vaporized isoflurane and maintained on a heating pad. The skin  
142    above the pectoralis was cleaned with Betadine Solution (Purdue Pharma, Pickering, Ontario,  
143    Canada) and feathers were brushed aside or removed, when necessary. Two bipolar electrodes  
144    were each made from a pair of 0.08 mm diameter bifilar HML-insulated silver wires (California  
145    Fine Wine Wire Company, Grover Beach, California, USA). The tips of each lead in each  
146    bipolar electrode were offset by approximately 0.5mm and stripped of insulation at the first  
147    0.5mm of each lead. The terminal ~1 mm of each electrode was inserted into a 26 gauge needle  
148    and bent 180 degrees in order to form a hook. One of the bipolar electrodes was inserted into the  
149    left pectoralis muscle (Figure 2A). Once inserted, the electrode was held in place using fine  
150    forceps, while the needle was removed. The hook at the end of the electrode kept the wire  
151    embedded in the muscle. The electrode lead was sutured (6-0, silk suture) to the skin above the  
152    pectoralis. The same procedure was followed for the implantation of the electrode into the left  
153    supracoracoideus muscle; however, the needle was inserted more deeply and at a location medial  
154    to the insertion of the first electrode (Figure 2B). A third, monofilar, insulated silver wire (HML,  
155    California Fine Wine Wire Company ) was stripped of insulation for the first 0.5mm of the lead  
156    and was similarly implanted under the skin on the bird's dorsal surface above the vertebral  
157    column and served as a ground electrode. The bipolar electrodes inserted into the pectoralis and  
158    supracoracoideus were fed cranially and dorsally over the left shoulder joint and then caudally  
159    along the back, running near the point of insertion of the ground electrode. All three wires were

160 then sutured together on the intervertebral fascia on the dorsal side of the animal. Figure 2  
161 illustrates the approximate location of placement of each of the two bipolar recording electrodes.  
162 Once the surgery was complete the anaesthesia was removed and the birds were allowed to  
163 recover. Recovery was considered complete when birds were readily able to sustain hover-  
164 feeding.

165

## 166 **Experimental Design**

167 The experiment was conducted in a testing arena that was 61cm in width by 62cm in  
168 length by 76cm in height. Beginning several days prior to data collection the birds were trained  
169 to perch, fly and feed, both unweighted and while wearing small weights (see below). A 1ml  
170 disposable syringe served as the artificial feeder. Birds were trained to hover feed on command  
171 by occluding the feeder opening with a small shield and allowing access for only brief durations  
172 at regular intervals every 10-20 minutes. Muscle activation and wingbeat kinematics were  
173 studied for all four birds under the following conditions: (1) hovering at a feeder (in ambient air  
174 without any load attached) (Chai and Dudley, 1996; Chai et al., 1997; Altshuler et al., 2010), (2)  
175 hovering at a feeder in progressively less dense normoxic (heliox-ambient) air mixtures (Chai  
176 and Dudley, 1996; Altshuler et al., 2010), (3) hovering at a feeder while lifting progressively  
177 heavier sub-maximal loads (Wells, 1993), and (4) hovering briefly while lifting maximal loads  
178 (Figure 1) (Chai et al., 1997; Altshuler et al., 2004; Altshuler et al., 2010).

179 Air density was reduced in the air tight test arena by progressive replacement of normal  
180 air at Scarborough, Ontario, Canada (elevation= 76m, density = 1.178 kg m<sup>-3</sup>) with normoxic  
181 heliox (21% oxygen, balance helium; density=0.41 kg m<sup>-3</sup>) at a rate of 8.5 l min<sup>-1</sup>. Air density  
182 was calculated following measurement of barometric pressure, temperature and humidity.



183 Following each hover feeding event, a Galton whistle was blown inside the arena and  
184 fundamental changes in frequency were used to calculate the reduced air density, relative to  
185 normal (as in Altshuler et al., 2010). Through trial and error we were able to time hover feeding  
186 events to coincide with air density values of approximately 1, 0.9, 0.8 and 0.7 kg m<sup>-3</sup>. Birds  
187 consistently failed to sustain hovering at the artificial feeder at densities lower than 0.7 kg m<sup>-3</sup>.

188       Following density reduction feeding trials, the door to the chamber was opened and  
189 density inside the chamber was allowed to return to normal. Then, after recording data during at  
190 least one subsequent feeding while hovering in normal air, birds were subjected to a series of  
191 load lifting trials. Submaximal loads consisting of a short string of beads connected to a rubber  
192 harness were applied to birds by placing the harness around an individual's neck. Loads with  
193 total masses of 0.25, 0.5 or 0.75 grams were constructed prior to data collection. Birds were  
194 accustomed to perching and hover-feeding while wearing loads during training periods prior to  
195 data collection (see above). Recordings were collected of birds hover-feeding while lifting each  
196 submaximal load in a randomized order. Recordings were discarded from analysis when any  
197 individual was not able to fly from the perch, feed for a minimum of 2 seconds, and fly back to  
198 the perch successfully, as failure to do so was taken as indication that the bird could not sustain  
199 the load.

200       Following all submaximal load lifting trials, the harness was removed and the bird was  
201 allowed to recover for a minimum of 20 minutes. Then, data were recorded while the unloaded  
202 bird hover-fed in normodense air. Following this baseline trial, birds were subjected to maximum  
203 load lifting trials. The attachment of weight via a harness placed around the neck was identical to  
204 that employed during submaximal load lifting except that the chain was significantly longer and  
205 included beads of known individual mass and spaced at ~1 cm intervals, weighing collectively

206 more than the hummingbird could lift. Birds were released from the floor of the arena and  
207 promptly flew directly upwards, as is their natural escape response, lifting progressively greater  
208 weight, until reaching a maximum elevation and load. Birds transiently hovered while lifting this  
209 maximal load before descending. A minimum of 3 maximal load lifting trials were recorded,  
210 until we were satisfied maximum flight effort had been elicited. A camera captured video from a  
211 side view which allowed us to determine the number of beads, and thus maximum mass, lifted.  
212 The trial that resulted in the bird lifting the maximum number of beads was chosen for further  
213 analysis. A recording of unweighted hover feeding in normodense air was obtained following the  
214 maximal load lifting trial. The electrodes were then removed from the bird under anaesthesia.  
215

## 216 **Electromyography**

217 During each trial listed above, the electrode wires coming from the bird remained  
218 connected to cable leads near the bottom edge of the arena. Sufficient electrode lengths were  
219 employed such that the leads remained slack at all times, and the lifted length never exceeded  
220 ~70 cm. EMG signals were amplified  $1000 \times$  with an extracellular amplifier (A-M Systems,  
221 Differential AC Amplifier, model 1700, Sequim, WA, USA). Amplifier filters were set to low  
222 and high frequency cut-offs of 0.1 Hz and 10 KHz, respectively. The analog signals were  
223 acquired using an analog-to-digital converter (Digidata 1440A, Molecular Devices, California,  
224 USA) sampling at 10KHz. EMG signals were recorded to PC using Axoscope (v.10.3, Molecular  
225 Devices) and were synchronized with high speed video recordings via 2 mechanisms (see  
226 below). The TTL signal which triggered the end of video recording was acquired on an  
227 additional channel of the amplifier. An additional analog to digital converter was also used, and  
228 both electromyographic (including the trigger) and videographic data were simultaneously

229 recorded to PC using MIDAS DA (Xcitex, Massachusetts, USA). This National Instruments  
230 (Austin, Texas, US) analog-to-digital converter was not as precise because it recorded at  
231 maximum frequency of 1000 Hz. However, it provided an independent means of confirming  
232 synchronization of the EMGs and video data. To facilitate statistical analysis and comparisons  
233 among individuals and among muscles, the EMG signals were post-processed. A zero-phase,  
234 forth-order high-pass Butterworth filter with a cut-off frequency set at approximately 12 times  
235 the wingbeat frequency was used to remove movement artifacts and set the mean of the inactive  
236 portions of the signal to zero. EMG area (the rectified area of each EMG burst), EMG amplitude  
237 (height of each spike within each burst), EMG onset (start of EMG activity prior to the beginning  
238 of the downstroke for the pectoralis and the start of EMG activity prior to the beginning of the  
239 upstroke for the supracoracoideus) and number of spikes per burst were calculated as in  
240 Altshuler et al., 2010. The spike threshold was set to 0.25 times the highest spike amplitude  
241 during each run, in order to automate the detection of discrete spikes and determine the number  
242 of spikes per burst. EMG spike amplitude and EMG area were each normalized against the  
243 maximum EMG spike amplitude or area, respectively, for each bird across all trials.

244

### 245 **Kinematic Analysis**

246 All flight trials were filmed using a high speed video camera (S-PRI, AOS technologies  
247 AG, Baden Daettwil, Switzerland) which recorded at 1000 frames per second at shutter speed of  
248 250  $\mu$ s. The camera was located above the arena and recorded video from an overhead view.  
249 Wingbeat frequency was calculated by dividing the recording frequency by the number of frames  
250 necessary for completion of a full wingbeat. Stroke amplitude was calculated by deriving the  
251 angular distance covered by each wing from the top of the upstroke (wrist pronation) to the

252 bottom of the downstroke (wrist supination) rotating about each shoulder. At each of these  
253 extreme positions, the wings appeared as thin lines when viewed from above. The same 15  
254 consecutive wingbeats were analyzed for both wingbeat kinematics and EMG characteristics.  
255 Only wingbeats which occurred when the bird was stationary at the feeder, or relatively  
256 stationary and at a maximum elevation during asymptotic load lifting trials, were analyzed.  
257 Angular velocity was calculated by dividing stroke amplitude (in radians) by the time taken to  
258 complete a half stroke.

259

### 260 **Morphological Measurements**

261 The mass of each bird was measured at the beginning and end of each experiment using a  
262 digital balance with a precision of 0.1 mg (MS-104S, Mettler Toledo, Switzerland). The mean of  
263 the two measurements constituted the estimated mass of the bird during all trials.

264

### 265 **Statistical Analysis**

266 All kinematic and EMG variables were averaged across the 15 analyzed wingbeats for  
267 each bird within each treatment. Data were analyzed using repeated measures ANOVA using the  
268 statistical program, SPSS (v.17.0, IBM, United States) to test for statistically significant  
269 differences among treatment means in EMG and kinematic parameters as a function of treatment  
270 level. Muscle type was included as a factor to test for differences in EMG parameters between  
271 the supracoracoideus and pectoralis. Because birds were similar in mass, and because the  
272 maximum loads each bird lifted were also quite similar ( $1.92 \pm 0.14$ ), mass lifted values were  
273 binned at average values of 2.8, 3.05, 3.3, 3.55 and 4.72 (for max load lifting). If the data  
274 violated the test of sphericity, the Greenhouse-Geisser, Huynh-Feldt, and Lower Bound

275 correction factors were applied to adjust the degree of freedoms and significance values. Lower  
276 bound corrected values are reported because the lower bound correction is the most conservative  
277 of the three. A mixed effects non-linear model incorporating individual as a random factor was  
278 fitted using the lme4 package (v. 0.999999-2) in the statistical program R (v. 2.15.3) in order to  
279 examine whether experiment type, load lifting versus air density reduction, was a significant  
280 factor influencing the relationship between neuromuscular activation intensity (EMG area) and  
281 angular velocity of the wing tip. Results were considered significant if P-values were less than  
282 0.05. Data are presented below as the mean  $\pm$  SD of values of the four birds.

283

## 284 **Results**

### 285 **Regulation of wingbeat kinematics via neural input across varying aerodynamic power** 286 **output requirements**

287 Wingbeat kinematics as a function of either total mass lifted or air density are shown in  
288 Figure 3. Within air density reduction trials, stroke amplitude increased significantly from  $140.9$   
289  $\pm 11.2$  degrees in ambient air to  $160.9 \pm 6.8$  degrees in the lowest air density ( $F_{4,12} = 17.47$ ,  $P <$   
290  $0.03$ ; Figure 3A); however, stroke amplitude never reached values as high as those observed  
291 during maximal load lifting assays, see below. Wingbeat frequency increased significantly as a  
292 function of declining air density ( $F_{4,12} = 4.55$ ,  $P = 0.02$ ; Figure 3B). However, this trend was  
293 driven by the value at the lowest air density ( $58 \pm 3$  Hz at  $0.7 \text{ kg m}^{-3}$ ) and wingbeat frequency  
294 did not vary significantly as a function of air density when the lowest air density trials were  
295 excluded ( $54 \pm 2$  to  $56 \pm 2$  Hz between  $1.2$  and  $0.8 \text{ kg m}^{-3}$ ;  $F_{3,9} = 1.29$ ,  $P = 0.34$ ). Stroke  
296 amplitude increased significantly as the birds hover fed while lifting progressively heavier loads  
297 ranging from  $140.9 \pm 11.2$  degrees when birds were unloaded ( $2.8 \text{ g total}$ ) to  $157.3 \pm 10.8$

298 degrees while lifting a total of 3.55 g ( $F_{1,3} = 24.35$ ,  $P = 0.02$ ; Figure 3C). During maximal load  
299 lifting trials ( $68.22 \pm 5.43\%$  of body mass was briefly lifted) stroke amplitudes reached an  
300 average of  $174.3 \pm 5.1$  degrees, which is close to the geometrical constraint of approximately 180  
301 degrees (Figure 3C). Wingbeat frequency did not vary significantly among sub-maximal load  
302 lifting trials, ranging from  $54 \pm 3$  to  $57 \pm 2$  Hz ( $F_{3,9} = 1.29$ ,  $P = 0.34$ ; Figure 3D). Wingbeat  
303 frequency was  $57 \pm 2$  Hz during maximal load lifting, which was not significantly greater than  
304 the wingbeat frequencies exhibited during sub-maximal load lifting ( $F_{4,12} = 1.26$ ,  $P = 0.34$ ;  
305 Figure 3D).

306 As a first step in analysing EMG data, the hovering trials that were conducted in  
307 normodense air at the beginning of the experiment and between the different flight challenges  
308 were compared. We found no significant differences in wingbeat kinematics or  
309 electromyographic waveforms (see below) from either the pectoralis or supracoracoideus across  
310 each of the unweighted hover feedings in normodense air (data not shown). This confirmed  
311 electrode placement did not change throughout the trial period.

312 Sample EMG traces from the pectoralis and supracoracoideus shown in Figure 4 are  
313 direct outputs from the amplifier with analog filter cut-offs of 1Hz and 10 kHz, prior to any post  
314 processing. EMG traces from the pectoralis and the supracoracoideus muscles of ruby-throated  
315 hummingbirds are composed of a discrete number of spikes per burst during hovering flight  
316 under both load lifting trials and air density reduction trials. Whenever the hummingbirds  
317 sustained hovering at the feeder; regardless of the flight challenge, the number of spikes per burst  
318 averaged 1-2 spikes per burst (see Figure 5A and 5C). However, this increased to 2.5-3 spikes  
319 per burst during maximal load lifting assays. Across air density reduction trials the number of  
320 spikes did not increase significantly; the pectoralis exhibited an average of  $1.35 \pm 0.23$  spikes per

321 burst ( $F_{4,12} = 2.82$ ,  $P = 0.07$ ); whereas, the supracoracoideus exhibited  $1.90 \pm 0.36$  spikes per  
322 burst ( $F_{4,12} = 27.874$ ,  $P = 0.67$ ; Figure 5A). Across all sub-maximal load lifting trials the number  
323 of spikes per burst did not increase significantly; the pectoralis exhibited an average of  $1.32 \pm$   
324  $0.28$  spikes per burst ( $F_{1,3} = 1.27$ ,  $P = 0.34$ ) and the supracoracoideus exhibited  $1.78 \pm 0.32$  spikes  
325 per burst ( $F_{1,3} = 2.43$ ,  $P = 0.22$ ; Figure 5C). Compared to the mean values across submaximal  
326 load lifting trials, the number of spikes per burst increased significantly during maximal  
327 asymptotic load lifting trials; the pectoralis exhibited  $2.57 \pm 0.38$  spikes per burst ( $F_{4,12} = 22.39$ ,  
328  $P < 0.001$ ) and the supracoracoideus exhibited  $2.8 \pm 0.59$  spikes per burst on average ( $F_{4,12} =$   
329  $5.78$ ,  $P = 0.008$ ).

330 Normalized EMG area (EMG area) increased significantly for the pectoralis from  $0.30 \pm$   
331  $0.04$  to  $0.58 \pm 0.02$  ( $F_{4,12} = 5.92$ ,  $P = 0.007$ ) and for the supracoracoideus muscle from  $0.31 \pm$   
332  $0.11$  to  $0.51 \pm 0.10$  ( $F_{4,12} = 5.81$ ,  $P = 0.008$ ) under air density reduction trials (Figure 5B). EMG  
333 area of both flight muscles increased significantly across submaximal load lifting assays and  
334 further during maximum load lifting (Figure 5D). EMG area in the pectoralis increased  
335 significantly from  $0.30 \pm 0.04$  to  $0.86 \pm 0.07$  ( $F_{1,3} = 46.17$ ,  $P = 0.007$ ) as birds lifted  $2.81 \pm 0.09$   
336 g to the maximum load. EMG area also increased for the supracoracoideus from  $0.31 \pm 0.11$  to  
337  $0.85 \pm 0.05$  as more mass was lifted ( $F_{1,3} = 75.50$ ,  $P = 0.003$ ). Some studies have used  
338 normalized EMG amplitude instead of normalized EMG area as a measure of the number of  
339 active motor units, but analysis of normalized EMG amplitude of the largest peak within a burst  
340 did not vary significantly when birds were lifting heavier loads or hovering in reduced air  
341 densities.

342 The activation of antagonistic muscles were completely out of phase with one another,  
343 with very little variation in timing relative to the wing stroke transition. Both the pectoralis and

344 supracoracoideus muscles were activated and deactivated prior to the start of muscle shortening  
345 (as indicated by wing movement). The timing of activation of the of the pectoralis muscle did not  
346 vary significantly across air density reduction trials, occurring on average 4 ms prior to the start  
347 of the downstroke ( $F_{4,12} = 0.31$ ,  $P = 0.87$ ; Figure 6A). The timing of activation of the  
348 supracoracoideus muscle was also constant, occurring on average 5 ms prior to the start of the  
349 upstroke ( $F_{4,12} = 0.69$ ,  $P = 0.61$ ; Figure 6A). Though the number of spikes per burst did not vary,  
350 EMG duration (measured from the start of first spike to the end of the final spike in the burst)  
351 increased significantly as air density decreased in both the pectoralis ( $F_{4,12} = 15.23$ ,  $P < 0.0001$ )  
352 and the supracoracoideus ( $F_{4,12} = 29.42$ ,  $P < 0.0001$ ; Figure 6B). The pectoralis EMG durations  
353 ranged from 1.45 ms to a maximum of 2.97 ms across air densities (7.48% to 18.27% of the  
354 wingbeat). The supracoracoideus EMG durations ranged from 1.72 to 4.22 ms (8.79% to 25.71%  
355 of the wingbeat). The timing of activation of the pectoralis muscle prior to the downstroke did  
356 not vary significantly among load lifting trials, occurring 4 ms prior to the start of the  
357 downstroke ( $F_{4,12} = 1.00$ ,  $P = 0.45$ ; Figure 6C) . Similarly the onset of EMGs of the  
358 supracoracoideus prior to the upstroke did not vary among load lifting trials, occurring 5 ms prior  
359 to the start of the upstroke ( $F_{4,12} = 2.05$ ,  $P = 0.15$ ; Figure 6C). EMG duration also increased  
360 significantly as the birds lifted greater loads for both the pectoralis ( $F_{4,12} = 28.67$ ,  $P < 0.0001$ )  
361 and the supracoracoideus ( $F_{4,12} = 29.42$ ,  $P < 0.0001$ ; Figure 6D). Under load lifting trials the  
362 EMG durations of the pectoralis and supracoracoideus ranged from 1.49 to 4.61 ms (7.64% to  
363 24.76% of the wingbeat) and 1.72 to 5.35 ms (8.79% to 28.55% of the wingbeat); respectively.

364

365 **Comparing the activation patterns of the supracoracoideus and the pectoralis**



366           The difference between the mean values of all four EMG parameters of the pectoralis and  
367 supracoracoideus followed the same patterns within both air density reduction and load lifting  
368 trials. On average, normalized EMG area did not significantly differ between the two muscles  
369 across air density reduction trials (Figure 5B) ( $F_{1,6} = 0.770$ ,  $P = 0.414$ ) or among load lifting  
370 trials (Figure 5D) ( $F_{1,6} = 0.025$ ,  $P = 0.88$ ). Hence, the intensity of activation of motor units,  
371 relative to the maximal activation observed at any point during the trials, did not differ between  
372 the two primary flight muscles.

373           The number of spikes per burst was significantly greater in the supracoracoideus than the  
374 pectoralis within both air density trials and load lifting trials. Across all the air density reduction  
375 trials the supracoracoideus exhibited  $0.77 \pm 0.26$  more spikes per burst (1.61 times as many  
376 spikes per burst) than the pectoralis (Figure 5A) ( $F_{1,6} = 27.874$ ,  $P = 0.002$ ). Across all sub-  
377 maximal load lifting trials the supracoracoideus exhibited  $0.68 \pm 0.27$  more spikes per burst  
378 (1.55 times as many spikes per burst) than the pectoralis (Figure 5C) ( $F_{1,6} = 20.52$ ,  $P = 0.004$ ).  
379 During maximal load lifting the supracoracoideus exhibited  $0.23 \pm 0.60$  more spikes per burst  
380 (1.08 times as many spikes per burst) than the pectoralis ( $F_{1,6} = 14.36$ ,  $P = 0.009$ ; Figure 5C).

381           EMG onset was significantly earlier in the supracoracoideus than in the pectoralis,  
382 measured with respect to the relevant wingbeat transition. During air density reduction trials, the  
383 supracoracoideus was activated 1 ms earlier ( $6.22 \pm 1.22\%$  earlier in the wingbeat), relative to  
384 the subsequent wingbeat transition, than the pectoralis ( $F_{1,6} = 5.83$ ,  $P = 0.044$ ; Figure 6A).  
385 During load lifting trials, the supracoracoideus was activated 1 ms earlier ( $4.18 \pm 0.77\%$  earlier  
386 in the wingbeat), relative to the subsequent wingbeat transition, than the pectoralis ( $F_{1,6} = 4.42$ ,  $P$   
387  $= 0.035$ ; Figure 6C).

388 The EMG duration of the supracoracoideus was significantly longer in the  
389 supracoracoideus than in the pectoralis. On average, during air density reduction trials, the  
390 supracoracoideus was activated  $0.80 \pm 0.33$  ms longer than the pectoralis ( $F_{1,6} = 10.96$ ,  $P =$   
391  $0.016$ ; Figure 6B). During load lifting trials, the supracoracoideus was activated, on average  $0.72$   
392  $\pm 0.20$  ms longer than the pectoralis ( $F_{1,6} = 15.86$ ,  $P = 0.007$ ; Figure 6D).

393

### 394 **Influence of air density on the relationship between muscle activation and wingbeat** 395 **kinematics**

396 Previous research in birds has demonstrated that normalized EMG area is a strongly  
397 correlated with peak muscle force, strain rate, and thus pectoralis power output during flight  
398 (Hedrick et al., 2003; Tobalske et al., 1997; Ellerby and Askew, 2007). Data presented here  
399 strongly suggest that as hovering power output requirements increase (with either decreasing air  
400 density or increasing load) flight muscle EMG area also increases. In order to understand  
401 whether air density influenced the translation of muscle activation into wingbeat kinematics we  
402 constructed a model which related EMG area, trial type, and the interaction of these two  
403 parameters, to the mean angular velocity of the wingtip. Individual was included as a random  
404 factor in the model design and models were fitted to the pectoralis and supracoracoideus  
405 separately. Using the languageR package (v. 1.4) in the R statistical programming environment we  
406 estimated confidence intervals and P-values for model parameters. As shown in Table 1, EMG  
407 area of the pectoralis or supracoracoideus were the only significant predictors of mean angular  
408 velocity of the wingtip in each model (pectoralis:  $P < 0.0001$ ; supracoracoideus:  $P < 0.0001$ ).  
409 Neither the experiment type, nor the interaction between experiment type and EMG area were  
410 significant predictors ( $P > 0.2$  in all cases; see Table 1).

411

412 **Discussion**

413 Ruby-throated hummingbirds increased performance during sustained hovering (in air  
414 density reduction and submaximal load lifting trials) primarily through increases in wing stroke  
415 amplitude while increases in wingbeat frequency were only observed when hovering at the  
416 lowest air density. Surprisingly, we did not observe significant increases in wingbeat frequency  
417 during maximal load lifting assays. While data from the lowest air density trial appears to be  
418 driving the trend in wingbeat frequency in our data, Chai and Dudley have previously reported a  
419 consistent increase in wingbeat frequency in ruby-throated hummingbirds subjected to  
420 progressive heliox replacement (Chai and Dudley, 1995; 1996). Thus, we feel confident that the  
421 trend we observed reflects a biological relevant pattern. The differences in reliance on stroke  
422 amplitude and/or wingbeat frequency increases to generate more power output dependent on the  
423 nature of the flight challenge are consistent with findings from studies on a variety of small  
424 hummingbird species (Wells, 1993; Chai and Dudley, 1995, 1996 Altshuler and Dudley 2003;  
425 Altshuler et al., 2004; Altshuler and Dudley; 2010). However, this is the first study to report such  
426 variation in kinematic adjustments and the first to investigate flight muscle EMG patterning in  
427 individual hummingbirds subjected to asymptotic load lifting and multiple distinct challenges to  
428 sustained hovering flight.

429 Ruby-throated hummingbirds activate each of the two major flight muscles with 1-3  
430 simultaneous bursts of motoneuron action potentials, eliciting muscle fiber action potentials in  
431 the pectoralis and supracoracoideus, prior to the corresponding wing stroke. The number of  
432 spikes per EMG burst are similar to that seen in other hummingbirds, and are substantially lower  
433 than observed in other avian taxa (Hagiwara et al., 1968; Altshuler et al., 2010; Tobalkse et al.,

434 2010; Hedrick et al., 2003; Ellerby & Askew, 2007; Tobalske & Dial, 1994). The increases in  
435 stroke amplitude observed during sustained hovering in hypodense air or while lifting  
436 submaximal loads was associated with increases in EMG burst intensity (area) but not changes in  
437 spike number per burst. The data presented here and in the previous studies just mentioned imply  
438 consistency in the neuromuscular and kinematic approaches to varying power output small  
439 hummingbirds employ during sustainable hovering or forward flight (Chai and Dudley, 1995;  
440 1996; Wells, 1993; Altshuler et al., 2010; Tobalske et al., 2007; 2010). In contrast to sustained  
441 hovering, both EMG area and spike number per burst increased substantially in both the  
442 pectoralis and supracoracoideus in order to generate significantly greater stroke amplitudes and  
443 angular velocities during maximal load lifting, a pattern also seen in the pectoralis of Anna's  
444 hummingbirds (Altshuler et al., 2010). Overall, these data suggest that ruby-throated  
445 hummingbirds employ spatial recruitment of motor units to drive sustainable increases in stroke  
446 amplitude while both spatial and temporal recruitment of motor units is required to achieve the  
447 greatest stroke amplitudes at high wingbeat frequencies during burst hovering in both major  
448 flight muscles, a finding consistent with previous reports (Altshuler et al, 2010; Tobalske et al.,  
449 2010).

450         Steady hover-feeding in hypodense heliox gas mixtures and while lifting submaximal  
451 loads is an exclusively or predominantly aerobically-power activity given it can be sustained for  
452 more than several seconds and as evidenced by the simultaneous rise in estimated mechanical  
453 power output and oxygen consumption rate, and resulting invariant muscle efficiency (Chai and  
454 Dudley, 1996; Wells, 1993). In contrast, we assume asymptotic maximal load lifting is  
455 dependent on supplemental anaerobic metabolic power input because hummingbirds cannot  
456 sustain maximal hovering effort for more than approximately 1 sec and subsequently pant

457 heavily for a few moments after descending to the chamber floor. The distinctive EMG  
458 waveform patterns associated with differences in the sustainability of muscle performance are  
459 striking. Our data show that a given proportion of motor units are activated on average once per  
460 wingbeat in the pectoralis and once or twice per wingbeat in the supracoracoideus with each  
461 wingbeat at frequencies of approximately 55 – 60 Hz, and suggest that activation of fibers at this  
462 frequency is entirely aerobically powered. In contrast, the activation of a greater proportion of  
463 motor units, some potentially 2-3 times per wingbeat, during maximal hovering appears to  
464 surpass an aerobically sustainable threshold.

465 Evidence from sonomicrometry in the pectoralis in combination with high speed  
466 recordings and analysis of wingbeat kinematics suggests that the wings are “kinematically rigid”  
467 and that wingtip position is an accurate proxy of flight muscle strain (Tobalske et al., 2007). In  
468 ruby-throated hummingbirds, flight muscle activation begins about halfway into the prior half  
469 stroke, when each muscle is lengthening. In addition, we found EMG activity ceased in each  
470 flight muscle before the start of the subsequent half wingbeat, and thus, before muscle  
471 shortening, across all hovering behaviours examined, consistent with findings in Anna’s and  
472 rufous hummingbirds (Altshuler et al., 2010; Tobalske et al., 2010). Because the wingbeat  
473 frequencies in each species were all greater than 40 Hz (Altshuler et al., 2010; Tobalske et al.,  
474 2010) it seems possible that the cessation of EMG activity prior to muscle shortening is a general  
475 feature of flight muscles operating near or above this frequency. Burst durations increased as  
476 mechanical power output requirements increased and were longest during maximal load lifting  
477 assays. Because burst duration was calculated as the time rectified EMG signal was different  
478 from 0 V, the significant increase in burst duration across sustained challenges while spike  
479 number remained constant is likely simply a reflection of the overall greater area (i.e. “height” ×

480 “width”) of these individual EMG spikes. Importantly, the significant increase in burst duration  
481 and spike number seen during maximal load lifting mean the flight muscles maintain tension  
482 later into the wingbeat cycle. Since wingbeat frequency either stays the same or increases during  
483 maximal load lifting compared to sustained hovering in normodense air, this implies that the  
484 shorter EMG burst duration and synchrony of fiber activation observed during sustained  
485 hovering is not solely the consequence of a constrained activation window which would allow  
486 sufficient time for relaxation to occur. Rather, it is the maximal burst durations observed during  
487 brief load lifting which may be constrained within the maximum allowable activation window.

488         While stroke amplitude increased both as a function of lower air density and while birds  
489 sustainably lifted progressively more mass, wingbeat frequency also increased at low air  
490 densities. These findings confirm that interspecific variation in hovering flight behaviour does  
491 not, by itself, explain the differences in kinematics observed between flight challenge types  
492 previously (Wells, 1993; Chai and Dudley, 1995; 1996; Altshuler et al., 2010). Further analysis  
493 is required to determine if the differences in kinematics observed with each trial type are the  
494 result of active variation in neural programming, or the consequence of differences in drag  
495 imposed on the wing by variation in air density in one trial type, but not the other. Aerodynamic  
496 theory predicts that profile drag, which accounts for a significant portion of total calculated  
497 aerodynamic power requirements in hovering hummingbirds (Wells, 1993; Altshuler, 2001),  
498 decreases as air density declines. Thus, it is possible that for a given neuromuscular input, and  
499 resulting muscle force, lower profile drag may result in greater wing acceleration in hypodense  
500 air. We examined the effect of neural input on resulting wing acceleration by fitting a model with  
501 normalized EMG area, experiment type, and their interaction term as factors. Mean angular  
502 velocity of the wingtip was chosen as the dependent variable because this kinematic parameter

503 captures variation in both stroke amplitude and the duration of the wingbeat. Individual was  
504 included as a random factor. As shown in Table 1, only EMG area was found to be a significant  
505 predictor of variation in mean angular velocity of the wingtip. The fact that neither experiment  
506 type nor the interaction term were found to be significant predictors indicates that the  
507 relationship between neuromuscular input (i.e. relative intensity of muscle activation) and mean  
508 angular velocity is consistent regardless of air density. It is possible that other wingbeat  
509 parameters, such as attack angle, vary with air density in a way that offsets the decline in drag on  
510 the wing. However, assuming this is not the case, we hypothesize that while the wing may be  
511 accelerated more easily through hypodense air, achieving a comparatively greater mean angular  
512 velocity, each flight muscle must provide additional power to decelerate the wing in advance of  
513 the stroke transition.

514 We observed a slight trend towards increased wingbeat frequency during maximal load  
515 lifting compared to unweighted hovering in normdense air. However, in contrast to findings by  
516 Chai et al. (1997), this increase was not significant. Wingbeat frequencies of ruby-throated  
517 hummingbirds during hovering flight in normodense air were between 51- 57 Hz and frequencies  
518 during maximally loaded flight were between 54-58Hz. Chai et al. (1997) reported frequencies  
519 of 49 – 52 Hz for hovering flight in normodense air and frequencies of 57-58 Hz for maximally  
520 loaded ruby-throated hummingbirds. Although the range in the values between our two studies  
521 are comparable the wingbeat frequencies observed in our birds during unweighted hovering in  
522 normodense air were slightly higher than those in Chai et al. (1997). It is unclear if this  
523 discrepancy is due to anything more than sampling error or interindividual variation. However, it  
524 should be noted that the birds studied by Chai et al. (1997) were not implanted with electrodes. It  
525 is possible that implantation of the electrodes in our birds may have affected kinematic

526 performance. A study by Ellerby and Askew (2007) found that implanting both EMG electrodes  
527 and sonomicrometry transducers in zebra finches and budgerigars results in significant  
528 differences in wingbeat kinematics. Due to time constraints, it was not possible for us to obtain a  
529 full set of control data in birds prior to electrode implantation. Still, in contrast to our findings,  
530 Anna's hummingbirds that were instrumented with electrodes did increase wingbeat frequency  
531 during maximal load lifting assays (Altshuler et al., 2010). Anna's hummingbirds are about 1.5  
532 times larger than ruby-throated hummingbirds and exhibit a lower and broader range of wingbeat  
533 frequencies than those observed in ruby-throated hummingbirds in our study or that by Chai et al.  
534 (1997). It is possible that electrode implantation also affected the wingbeat kinematics of  
535 hovering Anna's hummingbirds, though the effect was less pronounced. Unfortunately, data on  
536 the wingbeat kinematics of the individuals examined in the study by Altshuler et al. (2010)  
537 hovering while not implanted with electrodes is also unavailable.

538         In comparison to the pectoralis the supracoracoideus consistently exhibited more spikes  
539 per burst and burst duration was longer during all sustainable hovering trials. In addition, during  
540 all hovering behaviour, including maximal load lifting, the supracoracoideus was activated  
541 earlier prior to muscle shortening. The pectoralis and the supracoracoideus are both composed  
542 exclusively of type IIa (fast twitch oxidative-glycolytic) fibers (Suarez, 1992; Welch and  
543 Altshuler, 2009). Thus, significant differences in EMG waveforms between the two muscles  
544 cannot be related to variation in motor unit complement type or the relative activation timing of  
545 one motor unit type relative to another. We hypothesize two major differences in muscle  
546 anatomy may at least partly underlie the observed variation in EMG patterning. First, while the  
547 homogenous complement of fibers in each muscle produce similar force per unit fiber cross-  
548 sectional area (Reiser et al. 2013) the physiological cross-sectional area of the supracoracoideus



549 is substantially smaller. Thus, if a similar proportion of fibers are activated in each muscle, the  
550 supracoracoideus will produce less overall power output than the pectoralis. Because the  
551 hovering wingbeat is relatively symmetrical, it is possible that the power output requirements  
552 from each muscle are, unlike their sizes, also relatively similar. As shown in this study and  
553 elsewhere (Altshuler et al., 2010; Tobalske et al., 2010), increases in temporal recruitment of  
554 fibers within a given hummingbird flight muscle, reflected as increases in spike number per  
555 burst, correlate with increased power output. Therefore, it seems plausible that the longer EMG  
556 duration and greater spike number per burst in the supracoracoideus compared to the pectoralis  
557 reflects relatively greater temporal recruitment of motor units in response to greater power  
558 demands per unit muscle mass. The second anatomical difference may underlie the earlier  
559 activation, relative to muscle shortening, observed in the supracoracoideus. The muscle-tendon  
560 unit anatomy is distinctly different between the pectoralis and supracoracoideus. Though the  
561 supracoracoideus originates on the keel of the sternum, deep to the pectoralis, the distal tendon  
562 passes through the shoulder and inserts on the dorsal side of the humerus acting to elevate the  
563 wing (Zusi and Bentz, 1984). No long tendon attaches to the pectoralis at either its origin or  
564 insertion points. We hypothesize that neural activation occurs earlier in the supracoracoideus  
565 relative to muscle-tendon unit shortening because there is greater compliance of series elastic  
566 components (principally, this long tendon). Generally, the long, thin tendons attached to the belly  
567 of pennate distal hindlimb muscles of vertebrates with short fibres, are highly compliant  
568 (Roberts, 2002). Muscles with tendons that are highly compliant expend a large fraction of their  
569 shortening capacity stretching the tendon rather than causing skeletal movements directly. If, as  
570 we hypothesize, there is greater elastic compliance in the wing elevator muscle  
571 (supracoracoideus) than in the depressor (pectoralis) of hummingbirds, then it follows that the

572 contribution of elastic energy storage and recovery may play a relatively greater role in the  
573 deceleration and subsequent reacceleration of the wing during the downstroke-to-upstroke  
574 transition. Such asymmetry of elastic energy recovery in the otherwise relatively symmetrical  
575 hummingbird hovering wingbeat should be considered as the finer aspects of cumulative power  
576 output during hovering are investigated.

577         The neuromuscular encoding of modulation of wingbeat kinematics during sustained  
578 hovering flight appears highly conserved across species and hovering flight challenges. Ruby-  
579 throated hummingbirds adopt subtly different kinematic solutions to adjust flight performance  
580 when lifting sustainable loads as opposed to when hovering in hypodense air. Despite the  
581 reduction in drag on the wing, high stroke amplitudes at moderately higher wingbeat frequencies  
582 while hovering in hypodense air necessitate comparable increases in flight muscle activation,  
583 presumably as higher forces are needed to decelerate the wings prior to stroke transition. The  
584 high wingbeat frequencies of ruby-throated hummingbirds limit the amount of time available for  
585 the activation and deactivation of primary flight muscles. The limited activation window has  
586 resulted in motor unit recruitment being highly synchronized. With a single fiber type present in  
587 both major flight muscles, and one or two spike per burst during all sustained flight behaviours,  
588 it seems Anna's (Altshuler et al., 2010), rufous (Tobalske et al., 2010), and ruby-throated  
589 hummingbirds (this study) all modulate power output at high operating frequencies largely or  
590 exclusively by varying spatial recruitment in each muscle. Nonetheless, the fact that  
591 hummingbirds can increase spike number and burst duration during maximal burst hovering  
592 suggests that constraints on burst duration during sustained hovering are aerobic, rather than  
593 mechanical. While these results confirm that the relatively symmetrical hummingbird wingbeat  
594 is achieved by relatively similar changes in the intensity of activation of the antagonist primary

595 flight muscles, variation in the timing of activation and number of spikes per EMG burst were  
596 consistently different between the two muscles, likely reflecting differences in muscle  
597 morphology and compliance.

598

#### 599 Acknowledgements

600 Shanchai Zahid, Derrick Groom, and Piravinthan Sithamparanathan assisted in  
601 collection of the data. We thank Douglas Altshuler for providing custom-authored MATLAB  
602 analysis tools, for guidance regarding data analysis, and for helpful discussion. We thank  
603 Mahinda Samarakoon for assistance with coding in R. We also thank two anonymous reviewers  
604 for their comments. Funding for this research was provided by a Natural Sciences and  
605 Engineering Research Council of Canada (NSERC) Discovery Grant (#386466), a Canada  
606 Foundation for Innovation (CFI) Leaders Opportunity Fund grant (#25326), and an Ontario  
607 Research Fund, Research Infrastructure grant (#25326) to KCW.

608

609

610

611 **References**

- 612  
613 **Altshuler, D. L.** (2001). Ecophysiology of Hummingbird Flight Along Elevational Gradients:  
614 An Integrated Approach.
- 615  
616 **Altshuler, D. L. and Dudley, R.** (2003). Kinematics of hovering hummingbird flight along  
617 simulated and natural elevation gradients. *J. Exp. Biol.* **206**, 3139-3147.
- 618  
619 **Althsuler, D. L., Dudley, R., Heredia, S.M. and McGuire, J. A.** (2010). Allometry of  
620 hummingbird lifting performance. *J. Exp. Bio.* **213**, 725-734.
- 621  
622 **Althsuler, D. L., Dudley, R. and McGuire, J. A.** (2004). Resolution of a paradox:  
623 Hummingbird flight at high elevation does not come without a cost. *Proc. Natl. Acad. Sci.* **101**,  
624 17731-17736.
- 625  
626 **Althsuler, D. L., Quicazán-Rubio, E. M., Segre, P. S. and Middleton, K. M.** (2012). Wingbeat  
627 kinematics and motor control of yaw turns in Anna's hummingbirds (*Calypte anna*). *J. Exp. Biol.*  
**215**, 4070-4084.
- 628  
629 **Altshuler, D. L., Welch, K. C., Cho, B. H., Welch, D.B, Lin, A. F., Dickson, W. B. and**  
630 **Dickinson, M. H.** (2010). Neuromuscular control of wingbeat kinematics in Anna's  
631 hummingbirds (*Calypte anna*). *J. Exp. Biol.* **213**, 2507-2514.
- 632  
633 **Askew, G. N. and Marsh, R. L.** (1998). Optimal shortening velocity ( $V/V_{max}$ ) of skeletal  
634 muscle during cyclical contractions: length-force effects and velocity dependent activation and  
635 deactivation. *J. Exp. Biol.* **201**, 1527-1540.
- 636  
637 **Askew, G. N. and Marsh, R. L.** (1997). The effects of length trajectory on the mechanical  
638 power output of mouse skeletal muscles. *J. Exp. Biol.* **200**, 3119-3131.
- 639  
640 **Chai, P., Chen, J. S. C. and Dudley, R.** (1997). Transient hovering performance of  
641 hummingbirds under conditions of maximal loading. *J. Exp. Biol.* **200**, 921-929.
- 642  
643 **Chai, P. and Dudley, R.** (1995). Limits to vertebrate locomotor energetic suggested by  
644 hummingbirds hovering in heliox. *Nature.* **377**, 722-725.
- 645  
646 **Chai, P. and Dudley, R.** (1996). Limits to flight energetics of hummingbirds hovering in  
647 hypodense and hypoxic gas mixtures. *J. Exp. Biol.* **199**, 2285-2295.
- 648  
649 **Chai, P. and Dudley, R.** (1999). Maximum flight performance of hummingbirds: capacities,  
650 constraints, and trade-offs. *Am. Nat.* **153**, 398-411.
- 651  
652 **Degernes, A. L. and Feduccia, A.** (2001). Tenectomy of the supracoracoideus muscle to  
653 deflight pigeons (*Columba livia*) and cockatiels (*Nymphicus hollandicus*). *J. Avian Med. Surg.*  
654 **15**, 10-16.

- 655 **Ellerby, D. J. and Askew, G. N.** (2007). Modulation of pectoralis muscle function in  
656 budgerigars *Melopsittacus undulatus* and zebra finches *Taeniopygia guttata* in response to  
657 changing flight speed. *J. Exp. Biol.* **210**, 3789-3797.  
658
- 659 **Greenewalt, C. H.** (1962). Dimensional relationships for flying animals. *Smithsonian*  
660 *Misc. Collections.* **144**, 1- 46.  
661
- 662 **Hagiwara, S., Chichibu, S. and Simpson, N.** (1968). Neuromuscular mechanisms of wing beat  
663 in hummingbirds. *Z. Vergl. Physiol.* **60**, 209-218.  
664
- 665 **Hedrick, T. L., Tobalske, B. W. and Biewener, A. A.** (2003). How cockatiels modulate  
666 pectoralis power output across flight speeds. *J. Exp. Biol.* **206**, 1363-1378.  
667
- 668 **Reiser, P. J., Welch Jr., K. C., Suarez, R. K., and Altshuler, D. L.** (2013) Very low force-  
669 generating ability and unusually high temperature dependency in hummingbird flight muscle  
670 fibers. *J. Exp. Biol.* **216**, 2247-2256.  
671
- 672 **Roberts, T. J.** (2002). The integrated function of muscles and tendons during locomotion.  
673 *Comp. Biochem. and Physiol A.* **133**, 1087-1099.  
674
- 675 **Sokoloff, A. J., Gray-Chickering, J., Harry, J. D., Poore, S. O. and Goslow, G. E., Jr** (2001).  
676 The function of the supracoracoideus muscle during takeoff in the European starling (*Sternus*  
677 *vulgaris*): Maxheinz Sy revisited. In *New Perspectives on the Origin and Early Evolution of*  
678 *Birds: Proceedings of the International Symposium in Honor of John H. Ostrom* (ed. J. Gauthier  
679 and L. F. Gall), pp. 319-332. New Haven: Peabody Museum of Natural History.  
680
- 681 **Suarez, R.K.** (1992). Hummingbird flight: sustaining the highest mass-specific metabolic rates  
682 among vertebrates. *Experientia.* **48**, 565-569.  
683
- 684 **Tobalkse, W.** (2007). Biomechanics of bird flight. *J. Exp. Biol.* 2010, 3135-3146.  
685
- 686 **Tobalkse, W.** (2010). Hovering and intermittent flight in birds. *Bioinspir. Biomim.* **5**, 1-10.  
687
- 688 **Tobalske, B. W. and Biewener, A. A.** (2008). Contractile properties of the pigeon  
689 supracoracoideus during different modes of flight. *J. Exp. Biol.* **211**, 170-179.  
690
- 691 **Tobalkse, B. W., Biewener, A. A, Warrick, D. R., Hedrick, T. L. and Powers, D. R.** (2010).  
692 Effects of flight speed upon muscle activity in hummingbirds. *J. Exp. Biol.* **213**, 2515-2523.  
693
- 694 **Tobalske, B. W. and Dial, K. P.** (1994). Neuromuscular control and kinematics of intermittent  
695 flight in budgerigars (*Melopsittacus undulatus*). *J. Exp. Biol.* **187**, 1-18.  
696
- 697 **Tobalkse, B. W., Hedrick, T. L., Dial, K. P. and Biewener, A A.** (2003). Comparative Power  
698 Curves in bird flight. *Nature*, **421**, 363-366.  
699

- 700 **Tobalkse, B. W., Olson, N. E. and Dial, K. P.** (1997). Flight style of black-billed magpie:  
701 variation in wing kinematics, neuromuscular control, and muscle composition. *J. Exp. Zool.* **279**,  
702 313-329.  
703
- 704 **Tobalske, B. W., Warrick, D. R., Clark, C. J., Powers, D. R., Hedrick, T. L., Hyder, G. A.**  
705 **and Biewener, A.** (2007). Three-dimensional kinematics of hummingbird flight. *J. Exp. Biol.*  
706 **210**, 2368-2382.  
707
- 708 **Warrick, D. R., Tobalske, B.W. and Powers, D. R.** (2005). Aerodynamics of the hovering  
709 hummingbird. *Nature.* **453**, 1094-1097.  
710
- 711 **Warrick, D. R., Tobalske, B. W. and Powers, D. R.** (2009). Lift Production in the Hovering  
712 Hummingbird. *Proc. R. Soc. B.* **276**, 3747-3752.  
713
- 714 **Welch, K. C. and Altshuler, D. L.** (2009). Fiber type homogeneity of the flight musculature in  
715 small birds. *Comp. Biochem. Physiol. B* **152**, 324-331.  
716
- 717 **Wells, D. J.** (1993). Ecological correlates of hovering flight of hummingbirds. *J. Exp. Biol.* **179**,  
718 59-70.  
719
- 720 **Zusi, R., Bentz, D.** (1984) Myology of purple-throated carib (*Eulampis jugularis*) and other  
721 hummingbirds (Aves: Trochilidae). *Smithson. Contrib. Zool.* **385**, 1-70.  
722

723 Table 1. Mixed effects regression model of the relationship between mean angular velocity of the wingtip  
724 during hovering, the intensity of muscle activation (normalized EMG area), and the experiment type (air  
725 density reduction or load lifting). Note: individual is included as a random effect.

726

727

728 Figure 1. Experimental set-up for *in vivo* recordings under multiple hovering challenges. A) Air  
729 density reduction trials and unweighted hovering in normodense air were examined while a  
730 hummingbird fed from a suspended feeder. A high-speed video camera recorded wingbeat  
731 kinematics from an overhead view. Bipolar electrodes were inserted into the left pectoralis and  
732 supracoracoideus of the bird. During hypodense condition, air density was decreased by  
733 progressive replacement of ambient in the airtight chamber with heliox. Unweighted hovering  
734 trials were conducted using an identical setup except that no heliox replacement was attempted.  
735 B) Sub-maximal load lifting trials were performed as each bird hover fed in normodense air  
736 while lifting 0.25, 0.5, or 0.75 g strings of beads placed around its neck. 3) Maximal load lifting  
737 performance in normodense air was assessed as each bird was placed at the bottom of the arena  
738 with a string of color-coded beads was fixed around its neck via a harness. The birds flew  
739 upwards until the weight of the beads lifted off the floor equalled the maximum they could  
740 briefly bear while transiently hovering.

741

742 Figure 2. An illustration of the musculoskeletal anatomy of small hummingbirds (modified from  
743 Welch and Altshuler, 2009). Markings indicate the position of electrode placement in (A) the  
744 pectoralis and (B) the supracoracoideus muscle. Note the illustration in B is identical to that in A  
745 except that the pectoralis has been removed to show the supracoracoideus muscle, which lies  
746 deep to it.

747

748 Figure 3. Wingbeat kinematics [stroke amplitude (A, C) and wingbeat frequency (B, D)] in  
749 relation to experimental treatments [air density (A, B) or total mass lifted (C, D)] for hovering  
750 ruby-throated hummingbirds (*Archilochus colubris*). Data are binned according to treatment  
751 level. Symbols represent mean ( $\pm$  s.d.) of  $N = 4$  individuals. Trend lines are for illustration only  
752 and added only when variation in the data across treatment means was significant.

753

754 Figure 4. Sample EMG recordings of both flight muscles while the bird was hovering in ambient  
755 air lifting 0.75 g in excess of body mass. Using detection criteria defined in the methods section  
756 exactly 1 spike per burst in the pectoralis and 2 spikes per burst in the supracoracoideus were  
757 counted in each of the bursts shown. Note: signals are direct outputs from the amplifier with

758 analog filter cut-offs of 1 Hz and 10 kHz, prior to any post processing. Shaded areas correspond  
759 to the downstroke of the wing.



760 Figure 5. Number of spikes per (A, C), and normalized EMG area of (B, D), electromyogram  
761 bursts in the pectoralis and supracoracoideus of in relation to experimental treatments [air  
762 density (A, B) or total mass lifted (C, D)] for hovering ruby-throated hummingbirds (*Archilochus*  
763 *colubris*). Data are binned according to treatment level. Values for the pectoralis and  
764 supracoracoideus are offset slightly for clarity. EMG area is normalized within individuals to the  
765 maximum value recorded across all trials. A threshold value of 0.25 of the maximum spike  
766 intensity within an individual trial (hovering at a given air density or with a given mass lifted)  
767 was applied to automate the detection of individual spikes within bursts. Symbols represent mean  
768 ( $\pm$  s.d.) of N = 4 individuals.

769

770 Figure 6. Timing (onset of EMG activity prior to ensuing wingtip reversal; A, C) and duration of  
771 the EMG burst (B, D) in the pectoralis and supracoracoideus of in relation to experimental  
772 treatments [air density (A, B) or total mass lifted (C, D)] for hovering ruby-throated  
773 hummingbirds (*Archilochus colubris*). Data are binned according to treatment level. Values for  
774 the pectoralis and supracoracoideus are offset slightly for clarity. Symbols represent mean ( $\pm$   
775 s.d.) of N = 4 individuals.

776

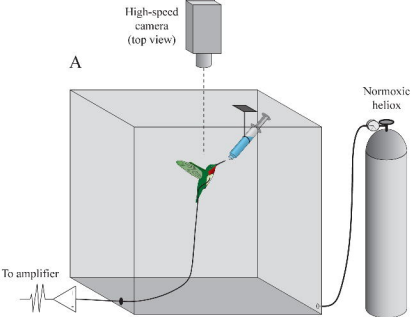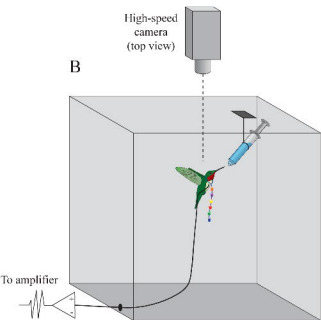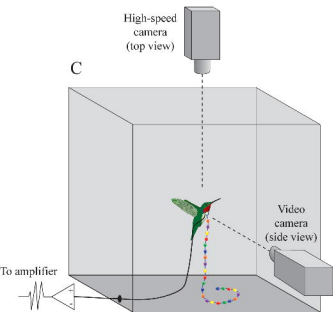

A

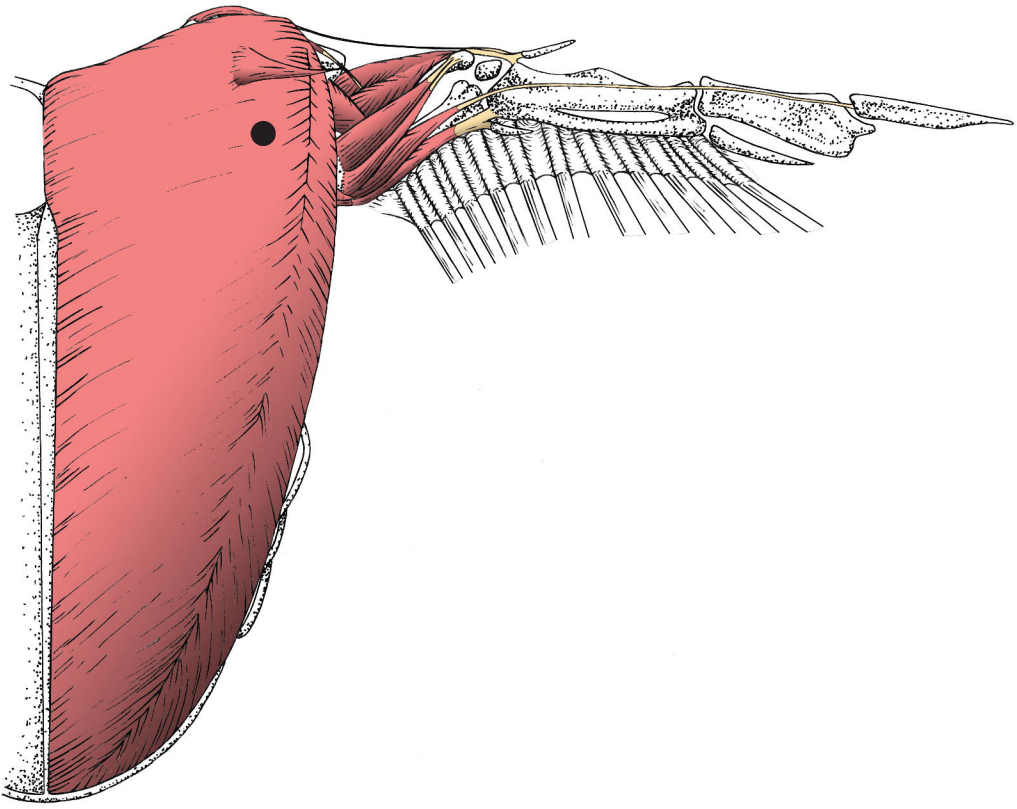

B

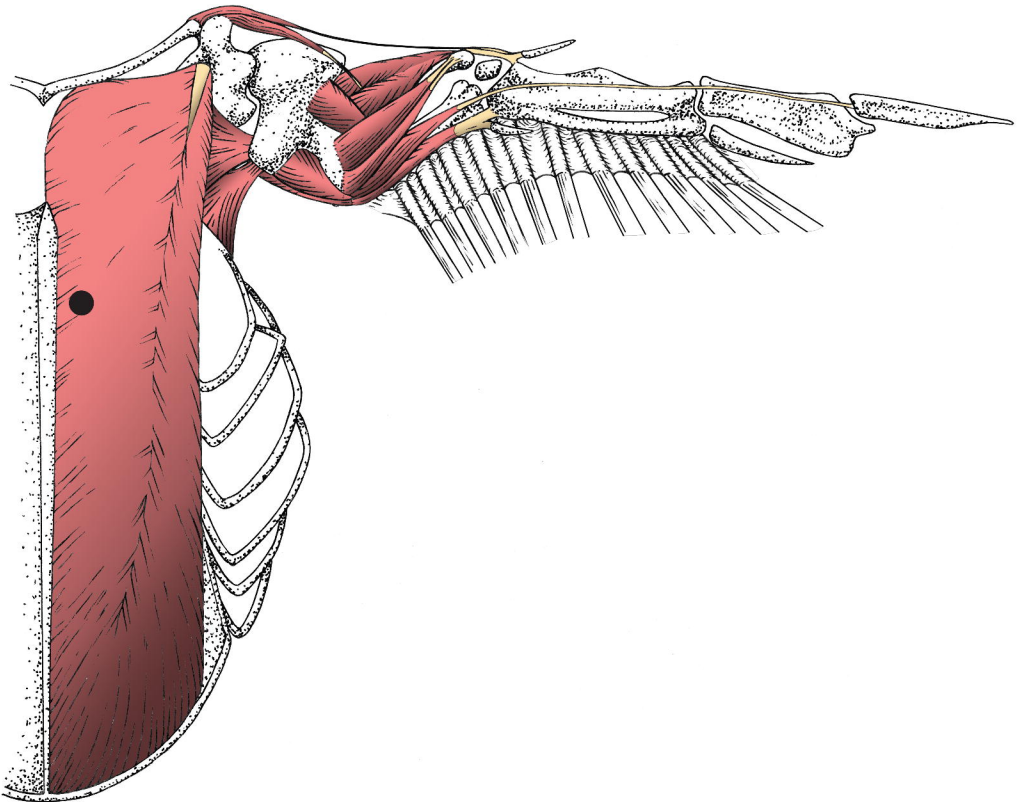

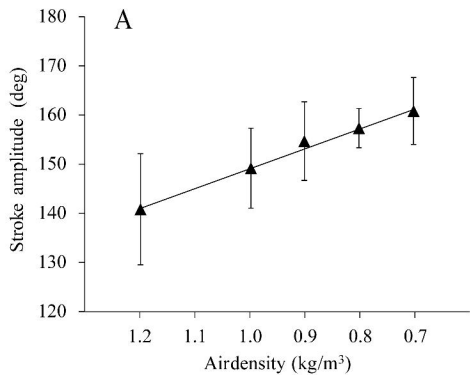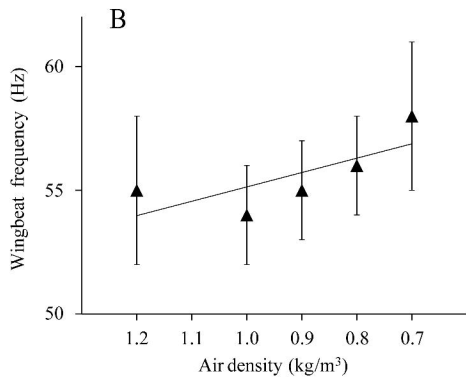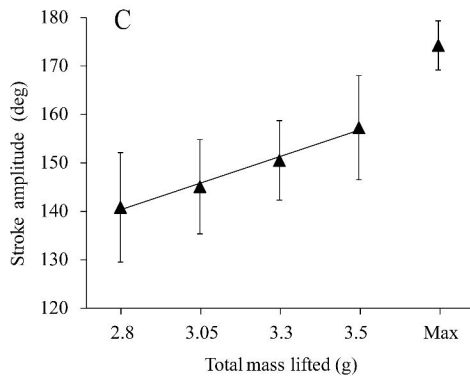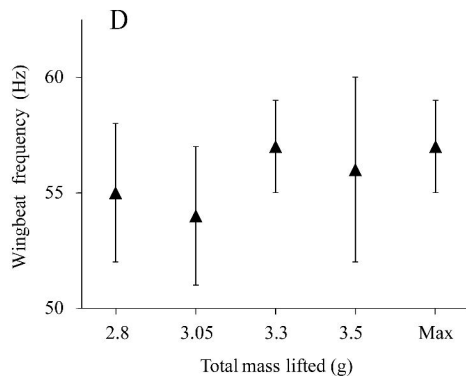

Pectoralis

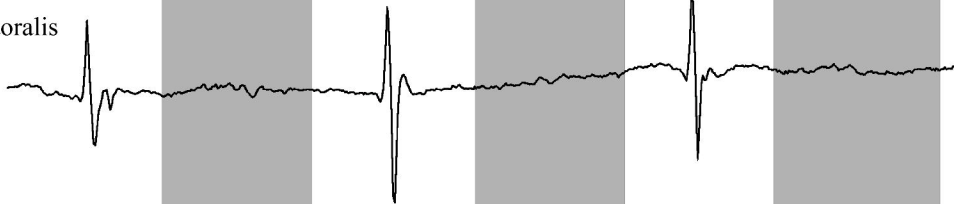

Supracoracoideus

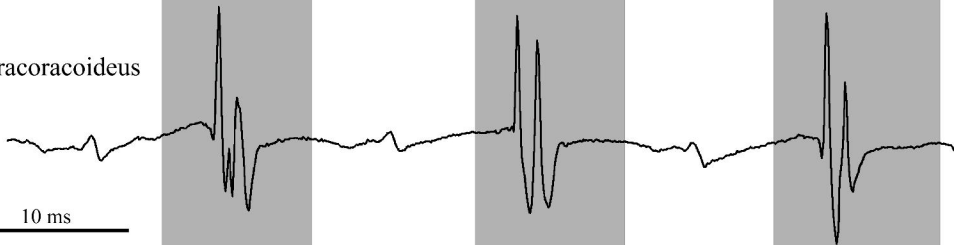

10 ms

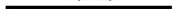

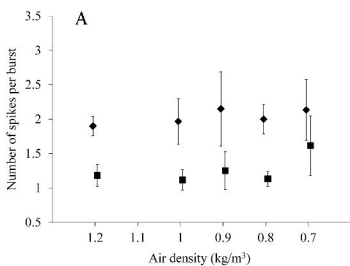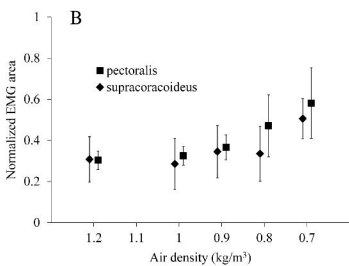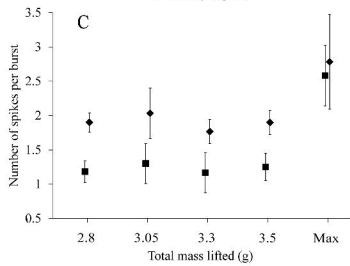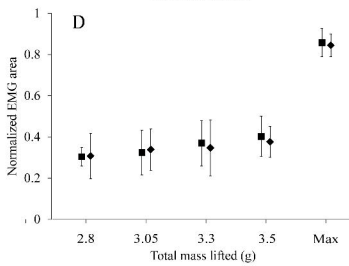

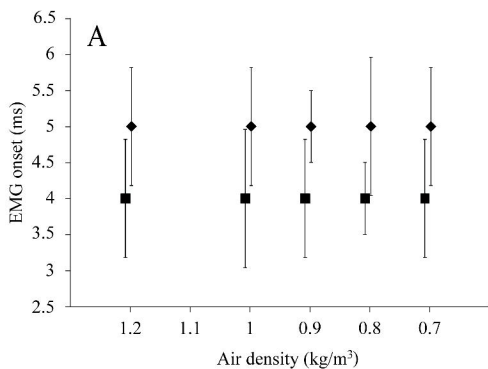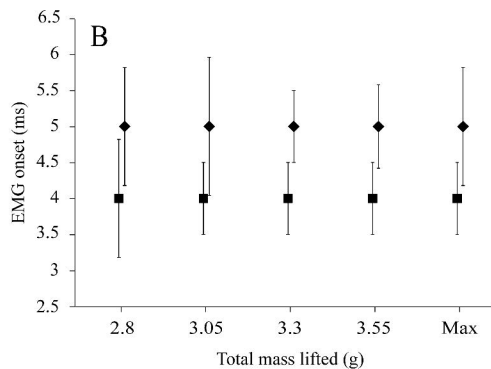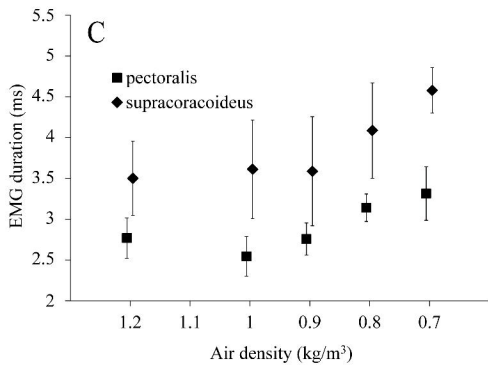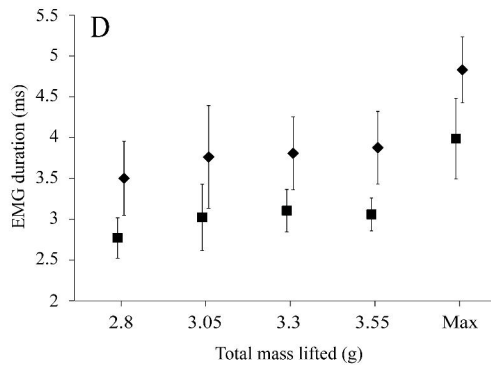

| Muscle           | Parameter                  | Mean angular velocity of the wingtip |                |
|------------------|----------------------------|--------------------------------------|----------------|
|                  |                            | 95% CI Estimate                      | <i>P</i> value |
| Pectoralis       | EMG area                   | (60.58, 117.04)                      | < 0.0001*      |
|                  | Experiment type            | (-26.34, 61.05)                      | 0.4133         |
|                  | EMG area × Experiment Type | (-184.29, 47.21)                     | 0.2358         |
| Supracoracoideus | EMG area                   | (59.97, 216.39)                      | < 0.0001*      |
|                  | Experiment type            | (-34.36, 46.86)                      | 0.9231         |
|                  | EMG area × Experiment Type | (-167.14, 59.70)                     | 0.4471         |
